# Supplementary material
Source: publisher figshare collection journal article supplement (https://gsajournals.figshare.com/ndownloader/files/26708582)
Supplement: Supplementary file 1 [file 26708582]

## Sheet: Table S2
Table S2.
Inheritance pattern	Module Name	Genes (N)	Imprinted genes (N)	Upregulated in Brekke 2016 (N)	Downregulated in Brekke 2016 (N)	Imprinted enrichment (p, binomial)	X chromosome genes (N)	X chromosome enrichment (p, binomial)	Pvalue, ANOVA Placental weight ~ module eigengene + age and sex	Pvalue, ANOVA Embryo weight ~ module eigengene + age and sex
Transgressive, SxC is outlier
	salmon	180	1	76	0	1	8	0.395	N/A*	N/A*
*upregulated module	red	565	1	87	0	0.2762	8	0.008924	1.533e-05	N/A*
	cyan	169	7	0	128	9.62e-05	11	0.02743	N/A*	N/A*
	orange	61	1	32	0	0.3136	2	1	N/A*	N/A*
	darkred	130	0	41	0	1	5	0.6195	N/A*	N/A*
	white	55	0	23	0	1	1	1	N/A*	N/A*
	pink	280	0	0	64	0.4261	19	0.003384	N/A*	N/A*
	purple	260	1	83	0	1	7	0.7283	N/A*	N/A*
Maternal effect
*downregulated module	brown	1160	36	0	321	9.741e-15	41	0.5638	1.007e-05	0.01598
	midnightblue	153	1	5	0	0.6108	7	0.3559	N/A*	N/A*
	blue	1165	1	122	0	0.01302	55	0.008102	N/A*	N/A*
	gray60	142	4	0	13	0.01187	9	0.05321	N/A*	N/A*
Paternal effect					0
	skyblue	42	1	8	0	0.2282	1	1	N/A*	N/A*
	royalblue	139	0	0	2	1	3	0.6339	0.4366	0.3429
One parent dominant
	lightgreen	141	0	0	28	1	5	0.8102	0.03466	N/A*
hybrids intermediate
	green	792	1	0	25	0.104	21	0.3689	N/A*	N/A*
	turquoise	1531	1	0	27	0.001567	45	0.5177	0.8388	0.2333
	greenyellow	231	0	1	0	0.4116	2	0.03884	N/A*	N/A*
	black	506	2	0	33	0.7757	7	0.01203	0.1546	N/A*
	lightyellow	140	0	0	0	1	2	0.3363	N/A*	N/A*
both hybrids transgressive, same direction
	lightcyan	147	5	47	0	0.002282	2	0.248	N/A*	N/A*
no relationship
	darkorange	56	1	8	0	0.2921	4	0.1104	N/A*	N/A*
	darkturquoise	106	1	0	13	0.48	3	1	N/A*	0.2379
	yellow	863	2	6	15	0.1897	32	0.4433	N/A*	0.8083
	darkgreen	128	0	0	10	1	2	0.4495	N/A*	N/A*
	darkgray	85	0	0	0	1	7	0.02143	N/A*	N/A*
	tan	203	1	2	1	1	3	0.23	0.9349	N/A*
	magenta	272	0	0	1	0.4221	12	0.3015	N/A*	N/A*
	gray	1690	2	2	47	0.004363	47	0.3041	N/A*	N/A*
